# Supplementary material for: Dimetallo[3.3]para- and metacyclophanes by self-assembly of pyridylmethyl armed-monoazatrithia- and monoazadithiaoxa-12-crown-4 ethers with Ag+ ions
Source: Royal Society of Chemistry journal article supplement (doi:10.1039/b513931g), 2006-01-01

## Supplementary Data

### Dimetallo[3.3]para- and metacyclophanes by self-assembly of pyridylmethyl armed-monoazatrithia- and monoazadithioxa-12-crown-4 ethers with Ag<sup>+</sup> ions

Yoichi Habata\*<sup>a,b</sup> and Futoshi Osaka<sup>a</sup>

- a) Department of Chemistry, Faculty of Science, Toho University, 2-2-1 Miyama, Funabashi, Chiba 274-8510, Japan,
- b) Research Center for Materials with Integrated Properties, Toho University, 2-2-1 Miyama, Funabashi, Chiba 274-8510

habata@chem.sci.toho-u.ac.jp

|                                                                                  |        |
|----------------------------------------------------------------------------------|--------|
| FAB MS of AgPF <sub>6</sub> complexes with <b>3b</b>                             | Page 2 |
| FAB MS of AgOTf complexes with <b>4a</b>                                         | Page 3 |
| FAB MS of AgOTf complexes with <b>4b</b>                                         | Page 4 |
| The Ag <sup>+</sup> ion induced <sup>1</sup> H NMR spectral changes of pyridine. | Page 5 |

4a-AgOTf

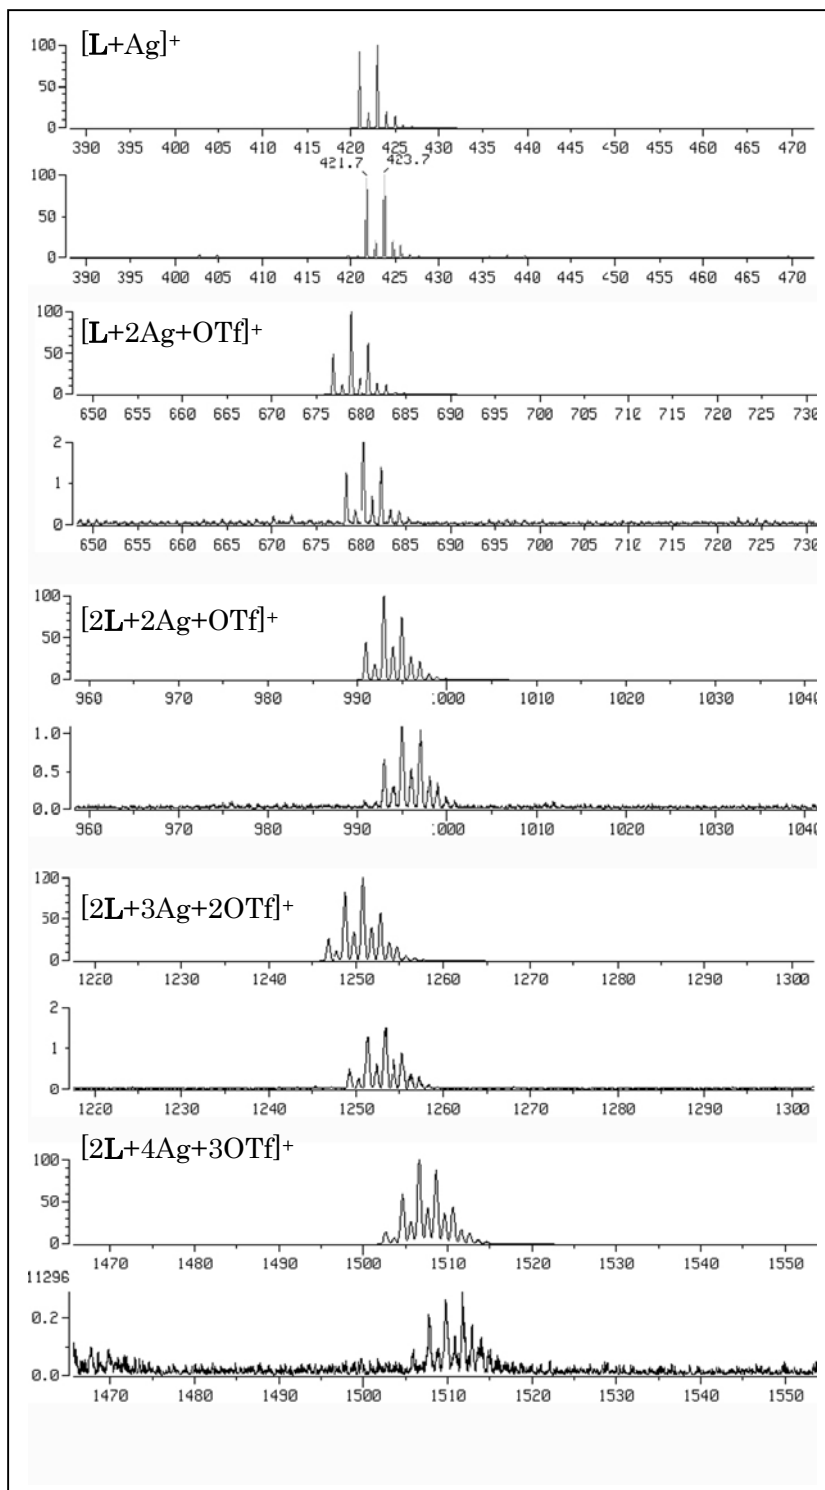

### 3b-AgPF<sub>6</sub>

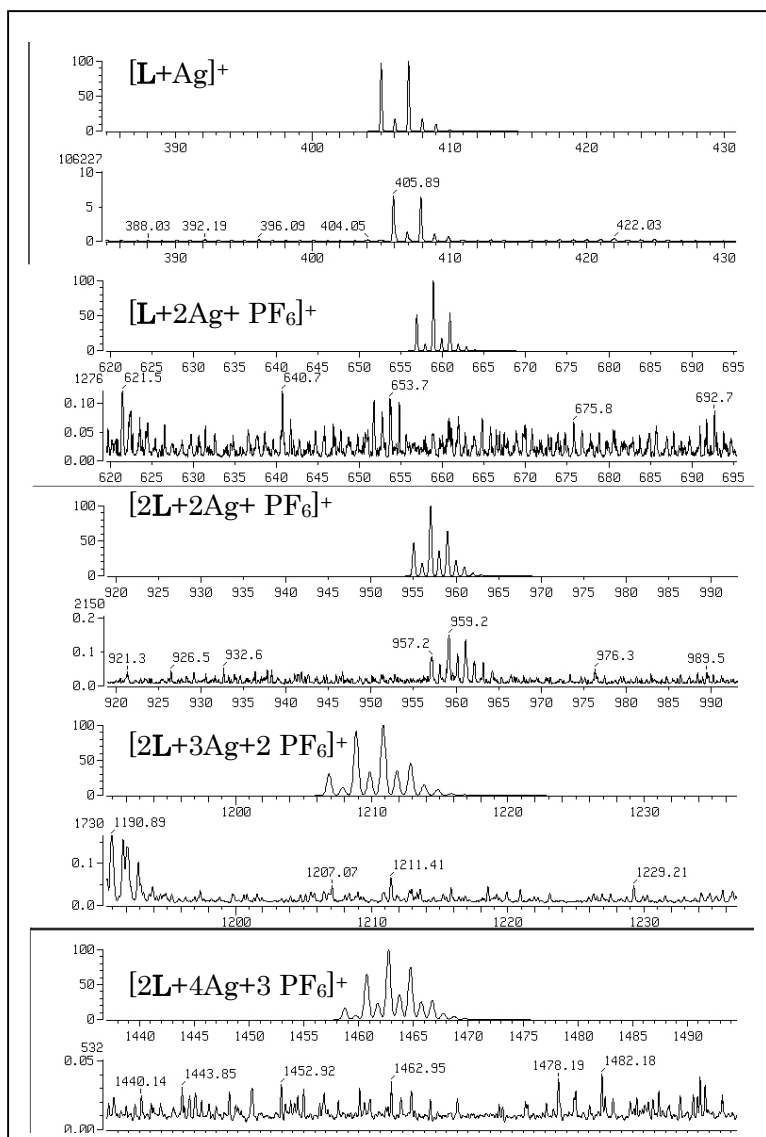

4a-AgOTf

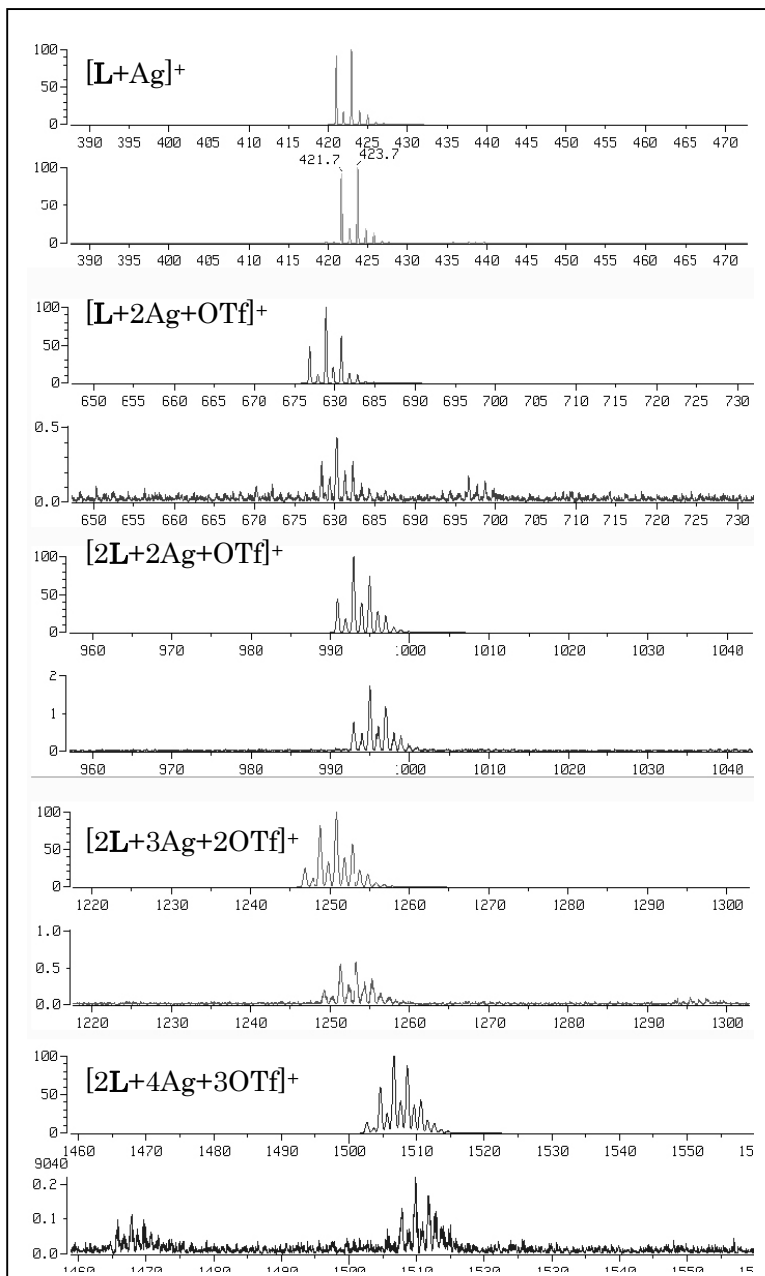

The  $\text{Ag}^+$  ion induced  $^1\text{H}$  NMR spectral changes of pyridine.

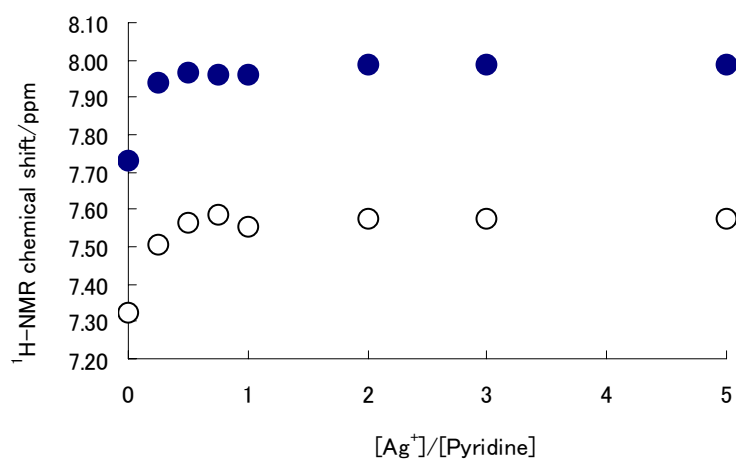

Supplement: b513931g.pdf [file b513931g.pdf]
